# Supplementary material for: A novel fold for acyltransferase-3 (AT3) proteins provides a framework for transmembrane acyl-group transfer
Source: eLife. 2023 Jan 11;12:e81547. doi: 10.7554/eLife.81547 (PMC9833829; doi:10.7554/eLife.81547)
Supplement: Figure 3—figure supplement 1—source data 1. [file elife-81547-fig3-figsupp1-data1.xlsx]

## Sheet: TMD RMSD 
Time / ns	RMSD @ 303 K/ nm	RMSD @ 320 K / nm
0	7e-07	7e-07
0.1	0.113701	0.11127
0.2	0.130327	0.124769
0.3	0.152391	0.135049
0.4	0.152236	0.133893
0.5	0.166944	0.147298
0.6	0.186615	0.147631
0.7	0.188486	0.149151
0.8	0.19394	0.160357
0.9	0.198865	0.1624
1	0.203935	0.164125
1.1	0.237074	0.161691
1.2	0.237018	0.172612
1.3	0.243391	0.177793
1.4	0.23433	0.166084
1.5	0.243223	0.173651
1.6	0.247809	0.19579
1.7	0.232478	0.183188
1.8	0.223545	0.196767
1.9	0.223045	0.197264
2	0.234424	0.195717
2.1	0.236156	0.215522
2.2	0.231338	0.211551
2.3	0.243753	0.204598
2.4	0.24625	0.21105
2.5	0.244126	0.201448
2.6	0.256823	0.208954
2.7	0.250565	0.207804
2.8	0.2436	0.207343
2.9	0.267927	0.198521
3	0.267375	0.205891
3.1	0.271859	0.199518
3.2	0.270178	0.201096
3.3	0.279544	0.208406
3.4	0.271699	0.202564
3.5	0.277995	0.187119
3.6	0.264816	0.204281
3.7	0.26448	0.220093
3.8	0.264827	0.231687
3.9	0.248687	0.223458
4	0.254288	0.233533
4.1	0.241411	0.242425
4.2	0.250804	0.247056
4.3	0.23838	0.258167
4.4	0.247619	0.251672
4.5	0.234191	0.272974
4.6	0.249995	0.273465
4.7	0.25683	0.275221
4.8	0.270709	0.252153
4.9	0.258519	0.261945
5	0.26185	0.266882
5.1	0.27525	0.253216
5.2	0.261302	0.265446
5.3	0.25586	0.278557
5.4	0.244394	0.261645
5.5	0.264703	0.258635
5.6	0.257122	0.262306
5.7	0.262826	0.253997
5.8	0.257874	0.251497
5.9	0.240027	0.261688
6	0.255908	0.254837
6.1	0.267454	0.278906
6.2	0.266971	0.276438
6.3	0.269986	0.275223
6.4	0.267299	0.298617
6.5	0.269199	0.281399
6.6	0.278399	0.281225
6.7	0.303342	0.283203
6.8	0.295515	0.279579
6.9	0.282199	0.277239
7	0.281956	0.273061
7.1	0.277606	0.26381
7.2	0.288201	0.236944
7.3	0.301402	0.24998
7.4	0.300972	0.252814
7.5	0.285467	0.263735
7.6	0.278402	0.264332
7.7	0.289397	0.260081
7.8	0.294803	0.264773
7.9	0.305192	0.26869
8	0.294468	0.289274
8.1	0.282328	0.305042
8.2	0.294637	0.288294
8.3	0.287144	0.2962
8.4	0.277832	0.293168
8.5	0.284259	0.291878
8.6	0.295351	0.288571
8.7	0.2872	0.287323
8.8	0.295013	0.295685
8.9	0.286229	0.312012
9	0.298053	0.293394
9.1	0.289663	0.278357
9.2	0.280666	0.298232
9.3	0.265681	0.294239
9.4	0.283928	0.293802
9.5	0.295308	0.309032
9.6	0.285078	0.305507
9.7	0.30072	0.288774
9.8	0.302999	0.283694
9.9	0.28779	0.284169
10	0.307464	0.285037
10.1	0.300884	0.296005
10.2	0.3226	0.275607
10.3	0.304461	0.295743
10.4	0.298381	0.314431
10.5	0.293135	0.29888
10.6	0.295457	0.305499
10.7	0.298237	0.305759
10.8	0.30108	0.295979
10.9	0.291017	0.318427
11	0.291071	0.304659
11.1	0.29795	0.311057
11.2	0.297008	0.305271
11.3	0.297465	0.325627
11.4	0.286803	0.317736
11.5	0.295806	0.322467
11.6	0.289644	0.319918
11.7	0.287118	0.311361
11.8	0.282075	0.320399
11.9	0.29824	0.32273
12	0.293337	0.313772
12.1	0.304425	0.326101
12.2	0.307525	0.316938
12.3	0.30626	0.326393
12.4	0.308532	0.324626
12.5	0.311879	0.326141
12.6	0.304997	0.315583
12.7	0.30651	0.320629
12.8	0.30871	0.338236
12.9	0.307018	0.330233
13	0.306837	0.312631
13.1	0.305158	0.311379
13.2	0.303487	0.302224
13.3	0.301301	0.293118
13.4	0.299163	0.307163
13.5	0.302942	0.304544
13.6	0.298257	0.30526
13.7	0.304495	0.315637
13.8	0.283956	0.320791
13.9	0.307185	0.330587
14	0.305353	0.328956
14.1	0.305353	0.330711
14.2	0.304708	0.317635
14.3	0.312395	0.322359
14.4	0.304023	0.328247
14.5	0.313007	0.329008
14.6	0.309063	0.336732
14.7	0.296202	0.327639
14.8	0.31172	0.326994
14.9	0.299246	0.322079
15	0.2981	0.325372
15.1	0.29875	0.332562
15.2	0.310434	0.334657
15.3	0.305358	0.339094
15.4	0.312165	0.333509
15.5	0.306005	0.334906
15.6	0.309119	0.32908
15.7	0.308605	0.320873
15.8	0.297216	0.320815
15.9	0.30909	0.323207
16	0.310762	0.336711
16.1	0.30124	0.343182
16.2	0.299713	0.349595
16.3	0.301491	0.355068
16.4	0.30368	0.328039
16.5	0.307061	0.348749
16.6	0.302023	0.33173
16.7	0.304915	0.330979
16.8	0.290796	0.350561
16.9	0.317011	0.350707
17	0.30943	0.343284
17.1	0.302366	0.334095
17.2	0.307368	0.342833
17.3	0.315405	0.348772
17.4	0.318684	0.354768
17.5	0.304207	0.371073
17.6	0.298755	0.35371
17.7	0.294628	0.366129
17.8	0.29103	0.353162
17.9	0.303545	0.346355
18	0.302482	0.352869
18.1	0.295799	0.364178
18.2	0.32012	0.372586
18.3	0.306573	0.362235
18.4	0.305419	0.356697
18.5	0.324707	0.355165
18.6	0.321882	0.359081
18.7	0.320801	0.365963
18.8	0.329784	0.35956
18.9	0.323668	0.351457
19	0.317956	0.362312
19.1	0.344966	0.355533
19.2	0.31148	0.366346
19.3	0.307354	0.357053
19.4	0.330546	0.351349
19.5	0.33483	0.355435
19.6	0.316572	0.351118
19.7	0.307589	0.340615
19.8	0.299471	0.33594
19.9	0.311773	0.324599
20	0.308647	0.329163
20.1	0.313692	0.347734
20.2	0.315559	0.343029
20.3	0.320734	0.365451
20.4	0.317641	0.383434
20.5	0.315794	0.382079
20.6	0.321901	0.37391
20.7	0.325078	0.369976
20.8	0.321938	0.389688
20.9	0.324219	0.376681
21	0.335623	0.375934
21.1	0.324725	0.380103
21.2	0.327903	0.392743
21.3	0.336573	0.36844
21.4	0.326199	0.37925
21.5	0.325452	0.375958
21.6	0.319017	0.355902
21.7	0.322215	0.359802
21.8	0.321103	0.388684
21.9	0.309113	0.355561
22	0.312929	0.374533
22.1	0.308217	0.366957
22.2	0.319195	0.379588
22.3	0.31597	0.384112
22.4	0.312391	0.379267
22.5	0.319447	0.389085
22.6	0.315074	0.376952
22.7	0.327723	0.381275
22.8	0.294981	0.396692
22.9	0.294746	0.389014
23	0.309908	0.401182
23.1	0.30614	0.383047
23.2	0.322246	0.408661
23.3	0.325388	0.40553
23.4	0.311318	0.392813
23.5	0.329875	0.397301
23.6	0.328179	0.406073
23.7	0.331538	0.419263
23.8	0.322506	0.409025
23.9	0.330604	0.411275
24	0.331614	0.40103
24.1	0.330366	0.388653
24.2	0.341659	0.401546
24.3	0.334961	0.407302
24.4	0.330067	0.388288
24.5	0.328976	0.404424
24.6	0.339114	0.388585
24.7	0.339161	0.407641
24.8	0.329388	0.418792
24.9	0.322781	0.409751
25	0.323522	0.413651
25.1	0.313004	0.396478
25.2	0.320204	0.40498
25.3	0.316577	0.390488
25.4	0.326999	0.40379
25.5	0.315889	0.396865
25.6	0.332227	0.402298
25.7	0.319422	0.422048
25.8	0.32625	0.408868
25.9	0.31158	0.417709
26	0.327059	0.428575
26.1	0.314207	0.414723
26.2	0.328782	0.399574
26.3	0.321982	0.412578
26.4	0.314857	0.399574
26.5	0.327195	0.406874
26.6	0.320056	0.395389
26.7	0.335035	0.39853
26.8	0.326829	0.398255
26.9	0.329956	0.387849
27	0.325467	0.385509
27.1	0.327968	0.395392
27.2	0.322718	0.397693
27.3	0.309897	0.390595
27.4	0.308818	0.390637
27.5	0.324337	0.379838
27.6	0.32322	0.378837
27.7	0.325748	0.379132
27.8	0.314468	0.383895
27.9	0.318211	0.382037
28	0.335041	0.384322
28.1	0.317224	0.368404
28.2	0.317317	0.384537
28.3	0.313443	0.392732
28.4	0.331573	0.395834
28.5	0.33305	0.385169
28.6	0.330499	0.386669
28.7	0.333366	0.394276
28.8	0.348574	0.387306
28.9	0.321054	0.393824
29	0.336233	0.387136
29.1	0.339006	0.391934
29.2	0.346018	0.385964
29.3	0.333781	0.388733
29.4	0.327455	0.381626
29.5	0.336449	0.382383
29.6	0.334236	0.388288
29.7	0.328884	0.372683
29.8	0.333276	0.382698
29.9	0.326332	0.392656
30	0.340851	0.377798
30.1	0.328825	0.397922
30.2	0.327095	0.383641
30.3	0.328914	0.39291
30.4	0.320196	0.395141
30.5	0.340911	0.40396
30.6	0.319956	0.396533
30.7	0.324702	0.4081
30.8	0.317333	0.388736
30.9	0.327638	0.401848
31	0.33189	0.392579
31.1	0.327682	0.414078
31.2	0.332329	0.400657
31.3	0.346622	0.39894
31.4	0.328243	0.395431
31.5	0.33326	0.404508
31.6	0.343564	0.396983
31.7	0.34114	0.408182
31.8	0.331399	0.410199
31.9	0.345981	0.390578
32	0.324364	0.402717
32.1	0.33125	0.404992
32.2	0.325649	0.408035
32.3	0.332928	0.419211
32.4	0.348928	0.425099
32.5	0.329306	0.402858
32.6	0.33722	0.408214
32.7	0.341449	0.41196
32.8	0.335632	0.403392
32.9	0.333523	0.408656
33	0.335838	0.407223
33.1	0.338019	0.409799
33.2	0.321499	0.416032
33.3	0.313572	0.410625
33.4	0.338725	0.408832
33.5	0.346127	0.416873
33.6	0.324919	0.416182
33.7	0.319558	0.411994
33.8	0.322967	0.4079
33.9	0.338808	0.411497
34	0.321523	0.423592
34.1	0.328509	0.415429
34.2	0.332142	0.433113
34.3	0.33544	0.434255
34.4	0.331659	0.42217
34.5	0.322104	0.425482
34.6	0.325386	0.422305
34.7	0.346371	0.424939
34.8	0.326184	0.432426
34.9	0.337288	0.43065
35	0.311188	0.421557
35.1	0.324516	0.418963
35.2	0.31548	0.433936
35.3	0.317289	0.435907
35.4	0.312683	0.432658
35.5	0.31931	0.448491
35.6	0.322778	0.434175
35.7	0.341233	0.425877
35.8	0.314493	0.433505
35.9	0.318044	0.421242
36	0.317424	0.424053
36.1	0.316731	0.426434
36.2	0.326901	0.435482
36.3	0.30847	0.435268
36.4	0.33268	0.418327
36.5	0.328061	0.440389
36.6	0.342372	0.444884
36.7	0.345875	0.441499
36.8	0.335269	0.44457
36.9	0.335008	0.429953
37	0.3222	0.440856
37.1	0.331717	0.430778
37.2	0.342724	0.410715
37.3	0.34097	0.426107
37.4	0.337613	0.414467
37.5	0.3324	0.405959
37.6	0.332592	0.414901
37.7	0.329295	0.418891
37.8	0.329642	0.420327
37.9	0.328612	0.421083
38	0.330164	0.421361
38.1	0.328757	0.427283
38.2	0.334798	0.424808
38.3	0.337933	0.436356
38.4	0.336163	0.424955
38.5	0.322689	0.436675
38.6	0.323189	0.421715
38.7	0.330256	0.418877
38.8	0.338134	0.440826
38.9	0.335786	0.415841
39	0.333901	0.422229
39.1	0.332847	0.419074
39.2	0.333014	0.406746
39.3	0.327941	0.412259
39.4	0.333203	0.426994
39.5	0.348227	0.437464
39.6	0.333433	0.42733
39.7	0.341375	0.414179
39.8	0.359666	0.426247
39.9	0.356735	0.412264
40	0.350715	0.420631
40.1	0.337145	0.425309
40.2	0.338427	0.412901
40.3	0.350262	0.413999
40.4	0.351562	0.420133
40.5	0.342169	0.41493
40.6	0.347593	0.42423
40.7	0.338187	0.430764
40.8	0.350178	0.424837
40.9	0.352578	0.414576
41	0.363258	0.397006
41.1	0.359379	0.41273
41.2	0.366489	0.415142
41.3	0.356738	0.402161
41.4	0.347585	0.421949
41.5	0.344038	0.416946
41.6	0.3333	0.433443
41.7	0.336104	0.437748
41.8	0.349511	0.412032
41.9	0.35462	0.417126
42	0.345187	0.408917
42.1	0.337769	0.421909
42.2	0.340271	0.415706
42.3	0.343717	0.433317
42.4	0.320654	0.426523
42.5	0.338213	0.426242
42.6	0.334516	0.431798
42.7	0.34454	0.419733
42.8	0.339913	0.436957
42.9	0.338142	0.424574
43	0.349251	0.440066
43.1	0.328761	0.433994
43.2	0.327703	0.433268
43.3	0.318803	0.436832
43.4	0.332908	0.41369
43.5	0.338826	0.430373
43.6	0.333223	0.421667
43.7	0.32295	0.448854
43.8	0.317486	0.443621
43.9	0.313171	0.434867
44	0.313748	0.439513
44.1	0.311756	0.447639
44.2	0.294753	0.436992
44.3	0.311636	0.440806
44.4	0.286994	0.431523
44.5	0.307679	0.423479
44.6	0.297027	0.43626
44.7	0.300524	0.431377
44.8	0.314522	0.413841
44.9	0.312748	0.430256
45	0.308831	0.439155
45.1	0.307903	0.424691
45.2	0.298702	0.43117
45.3	0.306717	0.423264
45.4	0.315141	0.425033
45.5	0.308782	0.426792
45.6	0.324915	0.412121
45.7	0.333408	0.412829
45.8	0.333627	0.430538
45.9	0.324183	0.437844
46	0.320045	0.44594
46.1	0.331957	0.443105
46.2	0.343672	0.451355
46.3	0.334089	0.423332
46.4	0.338376	0.428747
46.5	0.338258	0.42473
46.6	0.341914	0.42841
46.7	0.331651	0.429608
46.8	0.338881	0.442026
46.9	0.345654	0.437522
47	0.324959	0.426397
47.1	0.329015	0.423953
47.2	0.343888	0.422705
47.3	0.327032	0.43279
47.4	0.338627	0.437635
47.5	0.330629	0.434941
47.6	0.328024	0.430815
47.7	0.329776	0.445699
47.8	0.322574	0.437983
47.9	0.338759	0.448846
48	0.323022	0.438794
48.1	0.333292	0.442748
48.2	0.334893	0.433557
48.3	0.34345	0.434694
48.4	0.33049	0.427729
48.5	0.344924	0.435393
48.6	0.343589	0.44407
48.7	0.349038	0.427887
48.8	0.364852	0.425855
48.9	0.341682	0.422838
49	0.344651	0.425624
49.1	0.34866	0.432721
49.2	0.343569	0.429337
49.3	0.332629	0.432315
49.4	0.342007	0.431686
49.5	0.358201	0.429039
49.6	0.355945	0.428602
49.7	0.360103	0.431488
49.8	0.363928	0.426837
49.9	0.361632	0.430874
50	0.366731	0.420443
50.1	0.378047
50.2	0.367679
50.3	0.360084
50.4	0.35048
50.5	0.362866
50.6	0.350774
50.7	0.347804
50.8	0.350954
50.9	0.347918
51	0.352755
51.1	0.368636
51.2	0.36722
51.3	0.372352
51.4	0.351013
51.5	0.365773
51.6	0.358093
51.7	0.356202
51.8	0.366396
51.9	0.372678
52	0.351553
52.1	0.353206
52.2	0.358171
52.3	0.365623
52.4	0.345743
52.5	0.354332
52.6	0.352945
52.7	0.357901
52.8	0.359052
52.9	0.366227
53	0.354608
53.1	0.36212
53.2	0.366223
53.3	0.362924
53.4	0.370827
53.5	0.362346
53.6	0.350164
53.7	0.356725
53.8	0.349345
53.9	0.364806
54	0.370687
54.1	0.366846
54.2	0.380487
54.3	0.363563
54.4	0.376408
54.5	0.369757
54.6	0.375011
54.7	0.388017
54.8	0.374523
54.9	0.370145
55	0.359241
55.1	0.37853
55.2	0.377358
55.3	0.3756
55.4	0.376711
55.5	0.379352
55.6	0.370927
55.7	0.363498
55.8	0.374728
55.9	0.370507
56	0.381552
56.1	0.368323
56.2	0.38021
56.3	0.363993
56.4	0.388728
56.5	0.38786
56.6	0.364858
56.7	0.368128
56.8	0.383202
56.9	0.353632
57	0.382578
57.1	0.361266
57.2	0.359144
57.3	0.369983
57.4	0.355676
57.5	0.366217
57.6	0.371866
57.7	0.344895
57.8	0.367679
57.9	0.368157
58	0.365126
58.1	0.371174
58.2	0.359437
58.3	0.354877
58.4	0.359045
58.5	0.375173
58.6	0.360844
58.7	0.355689
58.8	0.362045
58.9	0.367218
59	0.36262
59.1	0.370124
59.2	0.366831
59.3	0.37019
59.4	0.380038
59.5	0.365839
59.6	0.369719
59.7	0.369169
59.8	0.354739
59.9	0.350372
60	0.362228
60.1	0.371356
60.2	0.357209
60.3	0.350294
60.4	0.354091
60.5	0.352047
60.6	0.343781
60.7	0.354707
60.8	0.361852
60.9	0.356913
61	0.35329
61.1	0.354021
61.2	0.358464
61.3	0.346911
61.4	0.364527
61.5	0.345273
61.6	0.361233
61.7	0.357964
61.8	0.363595
61.9	0.360092
62	0.355895
62.1	0.347322
62.2	0.350602
62.3	0.359073
62.4	0.370175
62.5	0.354698
62.6	0.356936
62.7	0.356807
62.8	0.351592
62.9	0.346459
63	0.353571
63.1	0.339166
63.2	0.349741
63.3	0.333155
63.4	0.337738
63.5	0.351238
63.6	0.342313
63.7	0.342747
63.8	0.338027
63.9	0.339918
64	0.340681
64.1	0.375697
64.2	0.363197
64.3	0.352345
64.4	0.351889
64.5	0.357473
64.6	0.350002
64.7	0.35859
64.8	0.372819
64.9	0.363795
65	0.369915
65.1	0.360737
65.2	0.362216
65.3	0.366475
65.4	0.354136
65.5	0.357269
65.6	0.349963
65.7	0.359847
65.8	0.336514
65.9	0.334162
66	0.342574
66.1	0.350825
66.2	0.344565
66.3	0.342957
66.4	0.355196
66.5	0.332943
66.6	0.341288
66.7	0.341987
66.8	0.353757
66.9	0.347025
67	0.332293
67.1	0.32653
67.2	0.338931
67.3	0.33314
67.4	0.352757
67.5	0.348701
67.6	0.348279
67.7	0.344359
67.8	0.349902
67.9	0.340492
68	0.350212
68.1	0.358694
68.2	0.35493
68.3	0.345002
68.4	0.349834
68.5	0.354722
68.6	0.340574
68.7	0.344833
68.8	0.338939
68.9	0.335229
69	0.341668
69.1	0.339475
69.2	0.342796
69.3	0.341551
69.4	0.349243
69.5	0.350331
69.6	0.357884
69.7	0.348206
69.8	0.339848
69.9	0.34252
70	0.347861
70.1	0.355626
70.2	0.352772
70.3	0.342836
70.4	0.338991
70.5	0.344319
70.6	0.338078
70.7	0.342906
70.8	0.34389
70.9	0.341763
71	0.326296
71.1	0.340126
71.2	0.347934
71.3	0.337541
71.4	0.344971
71.5	0.355582
71.6	0.34544
71.7	0.341616
71.8	0.338519
71.9	0.350714
72	0.347229
72.1	0.337592
72.2	0.347094
72.3	0.356475
72.4	0.350418
72.5	0.338533
72.6	0.350287
72.7	0.342679
72.8	0.344427
72.9	0.356236
73	0.341302
73.1	0.342924
73.2	0.353432
73.3	0.351927
73.4	0.349262
73.5	0.360034
73.6	0.35751
73.7	0.350006
73.8	0.343725
73.9	0.350687
74	0.355283
74.1	0.350438
74.2	0.348784
74.3	0.359963
74.4	0.364174
74.5	0.362637
74.6	0.353249
74.7	0.355123
74.8	0.354395
74.9	0.336052
75	0.350608
75.1	0.34743
75.2	0.339296
75.3	0.354612
75.4	0.359474
75.5	0.369645
75.6	0.336697
75.7	0.346876
75.8	0.346919
75.9	0.347398
76	0.354217
76.1	0.346781
76.2	0.364989
76.3	0.349989
76.4	0.362371
76.5	0.349265
76.6	0.365892
76.7	0.354106
76.8	0.363061
76.9	0.354858
77	0.352899
77.1	0.360746
77.2	0.354622
77.3	0.36633
77.4	0.368484
77.5	0.371665
77.6	0.378353
77.7	0.380125
77.8	0.379273
77.9	0.370733
78	0.374147
78.1	0.369253
78.2	0.365522
78.3	0.365118
78.4	0.361474
78.5	0.366972
78.6	0.358198
78.7	0.349725
78.8	0.362045
78.9	0.358866
79	0.353957
79.1	0.353056
79.2	0.365372
79.3	0.355681
79.4	0.35898
79.5	0.361856
79.6	0.363859
79.7	0.372269
79.8	0.365024
79.9	0.361482
80	0.360583
80.1	0.367386
80.2	0.354625
80.3	0.364501
80.4	0.35311
80.5	0.348756
80.6	0.365515
80.7	0.356619
80.8	0.370752
80.9	0.361087
81	0.348319
81.1	0.368429
81.2	0.35773
81.3	0.363699
81.4	0.362129
81.5	0.356243
81.6	0.350411
81.7	0.360028
81.8	0.366258
81.9	0.347119
82	0.353767
82.1	0.3594
82.2	0.355908
82.3	0.362273
82.4	0.350391
82.5	0.348472
82.6	0.344404
82.7	0.347419
82.8	0.35887
82.9	0.337833
83	0.342309
83.1	0.352978
83.2	0.347689
83.3	0.358218
83.4	0.343801
83.5	0.356664
83.6	0.340942
83.7	0.332555
83.8	0.347396
83.9	0.352905
84	0.355618
84.1	0.354192
84.2	0.357687
84.3	0.354745
84.4	0.378412
84.5	0.346112
84.6	0.366354
84.7	0.365365
84.8	0.350041
84.9	0.354998
85	0.35942
85.1	0.346164
85.2	0.35955
85.3	0.366092
85.4	0.358174
85.5	0.358573
85.6	0.358993
85.7	0.354335
85.8	0.360773
85.9	0.351712
86	0.349711
86.1	0.35403
86.2	0.356888
86.3	0.355431
86.4	0.34787
86.5	0.360142
86.6	0.348535
86.7	0.364642
86.8	0.348074
86.9	0.362326
87	0.364508
87.1	0.347804
87.2	0.357383
87.3	0.364646
87.4	0.351755
87.5	0.35724
87.6	0.370876
87.7	0.346841
87.8	0.357875
87.9	0.362036
88	0.370282
88.1	0.371396
88.2	0.382062
88.3	0.370811
88.4	0.375748
88.5	0.37957
88.6	0.37741
88.7	0.377452
88.8	0.368478
88.9	0.367915
89	0.377074
89.1	0.363813
89.2	0.366354
89.3	0.363779
89.4	0.371197
89.5	0.359937
89.6	0.365888
89.7	0.369582
89.8	0.367437
89.9	0.376277
90	0.363068
90.1	0.363777
90.2	0.367812
90.3	0.36509
90.4	0.371109
90.5	0.37119
90.6	0.36121
90.7	0.359574
90.8	0.366046
90.9	0.365787
91	0.36196
91.1	0.361649
91.2	0.35663
91.3	0.352947
91.4	0.352897
91.5	0.340258
91.6	0.345077
91.7	0.35159
91.8	0.372141
91.9	0.375189
92	0.377209
92.1	0.366833
92.2	0.36731
92.3	0.375469
92.4	0.367099
92.5	0.357834
92.6	0.370126
92.7	0.359921
92.8	0.367713
92.9	0.371863
93	0.361015
93.1	0.367907
93.2	0.372354
93.3	0.370038
93.4	0.366499
93.5	0.360941
93.6	0.370619
93.7	0.358911
93.8	0.3533
93.9	0.353382
94	0.365642
94.1	0.360009
94.2	0.368527
94.3	0.356936
94.4	0.371893
94.5	0.364743
94.6	0.377914
94.7	0.369177
94.8	0.362235
94.9	0.360986
95	0.373558
95.1	0.372165
95.2	0.365999
95.3	0.367541
95.4	0.361879
95.5	0.376258
95.6	0.385659
95.7	0.384665
95.8	0.373071
95.9	0.369512
96	0.374726
96.1	0.384241
96.2	0.384312
96.3	0.378182
96.4	0.382178
96.5	0.373023
96.6	0.392209
96.7	0.378678
96.8	0.382819
96.9	0.388494
97	0.381444
97.1	0.384777
97.2	0.376953
97.3	0.360886
97.4	0.375897
97.5	0.388621
97.6	0.386163
97.7	0.378737
97.8	0.394518
97.9	0.375165
98	0.373749
98.1	0.370056
98.2	0.369418
98.3	0.377282
98.4	0.38063
98.5	0.390644
98.6	0.381632
98.7	0.383034
98.8	0.371994
98.9	0.377136
99	0.376551
99.1	0.378917
99.2	0.376298
99.3	0.384073
99.4	0.360303
99.5	0.358917
99.6	0.367148
99.7	0.381371
99.8	0.382185
99.9	0.382962
100	0.39184
