# Supplementary material for: A novel fold for acyltransferase-3 (AT3) proteins provides a framework for transmembrane acyl-group transfer
Source: eLife. 2023 Jan 11;12:e81547. doi: 10.7554/eLife.81547 (PMC9833829; doi:10.7554/eLife.81547)
Supplement: Figure 3—figure supplement 1—source data 2. [file elife-81547-fig3-figsupp1-data2.xlsx]

## Sheet: TMD RMSF
Resid	RMSF @ 303 K / nm	RMSF @ 320 K / nm
1	0.4754	0.9189
2	0.4028	0.6763
3	0.3682	0.5311
4	0.307	0.3517
5	0.2319	0.2196
6	0.1675	0.1962
7	0.1266	0.1316
8	0.1387	0.1191
9	0.1206	0.11
10	0.1158	0.1141
11	0.1363	0.1074
12	0.1285	0.0949
13	0.113	0.103
14	0.1168	0.1033
15	0.1353	0.0977
16	0.1312	0.0907
17	0.1163	0.1134
18	0.1191	0.1197
19	0.1375	0.1215
20	0.1467	0.1407
21	0.1263	0.1496
22	0.1279	0.1475
23	0.1354	0.1656
24	0.1609	0.1808
25	0.1511	0.1774
26	0.1641	0.18
27	0.1983	0.1692
28	0.2189	0.1879
29	0.2501	0.1837
30	0.2689	0.1632
31	0.2954	0.2467
32	0.3113	0.2855
33	0.1819	0.3402
34	0.1195	0.3582
35	0.1136	0.2264
36	0.1025	0.166
37	0.0821	0.2064
38	0.0736	0.1556
39	0.0765	0.1006
40	0.0681	0.0878
41	0.0679	0.0846
42	0.0689	0.0823
43	0.0606	0.0625
44	0.0625	0.071
45	0.0691	0.0925
46	0.0673	0.0829
47	0.0614	0.0779
48	0.0645	0.1003
49	0.0691	0.1049
50	0.0576	0.0921
51	0.0574	0.1077
52	0.0647	0.1286
53	0.0675	0.1097
54	0.0688	0.1136
55	0.0828	0.1345
56	0.088	0.1338
57	0.0992	0.1261
58	0.1148	0.1586
59	0.1352	0.178
60	0.1518	0.1595
61	0.1593	0.1767
62	0.1127	0.1376
63	0.1167	0.1364
64	0.1162	0.1339
65	0.1206	0.1814
66	0.1137	0.162
67	0.0939	0.1106
68	0.0969	0.14
69	0.108	0.1667
70	0.1076	0.1379
71	0.1127	0.1083
72	0.1185	0.1339
73	0.1211	0.1155
74	0.1058	0.1002
75	0.0932	0.0964
76	0.0835	0.0999
77	0.0852	0.0928
78	0.0914	0.0829
79	0.0781	0.0865
80	0.0776	0.0849
81	0.0725	0.0766
82	0.0689	0.0958
83	0.0645	0.1323
84	0.0684	0.156
85	0.0725	0.1545
86	0.0727	0.1962
87	0.0667	0.1565
88	0.0684	0.1052
89	0.0849	0.1265
90	0.1008	0.1459
91	0.114	0.1166
92	0.1349	0.1894
93	0.1415	0.2284
94	0.1305	0.1891
95	0.1735	0.1947
96	0.196	0.1987
97	0.1998	0.168
98	0.1367	0.1379
99	0.1182	0.1347
100	0.1141	0.1341
101	0.1057	0.1219
102	0.0987	0.1245
103	0.0883	0.1317
104	0.0881	0.1228
105	0.082	0.1137
106	0.066	0.1478
107	0.0718	0.1704
108	0.0764	0.1654
109	0.0812	0.1697
110	0.0886	0.2671
111	0.0932	0.2474
112	0.0821	0.1866
113	0.0885	0.1026
114	0.1643	0.1213
115	0.1187	0.128
116	0.0964	0.1463
117	0.0993	0.243
118	0.0885	0.1873
119	0.1094	0.202
120	0.126	0.2494
121	0.1175	0.2989
122	0.1319	0.2266
123	0.1323	0.174
124	0.1609	0.197
125	0.1529	0.1438
126	0.1785	0.2374
127	0.1827	0.2464
128	0.1634	0.3238
129	0.1466	0.2178
130	0.1347	0.2206
131	0.1389	0.2167
132	0.1155	0.1607
133	0.0926	0.132
134	0.1169	0.1065
135	0.0886	0.1098
136	0.1053	0.1158
137	0.1411	0.114
138	0.113	0.1101
139	0.1354	0.144
140	0.1666	0.2632
141	0.1006	0.2587
142	0.0903	0.1946
143	0.1054	0.2212
144	0.1105	0.2468
145	0.0967	0.203
146	0.0859	0.1505
147	0.1038	0.1881
148	0.1141	0.2199
149	0.0981	0.1771
150	0.0837	0.153
151	0.0796	0.1663
152	0.0916	0.1712
153	0.1036	0.184
154	0.0934	0.1703
155	0.0987	0.1727
156	0.1159	0.1864
157	0.1224	0.2024
158	0.1288	0.2156
159	0.1451	0.248
160	0.1218	0.3392
161	0.1333	0.3339
162	0.1467	0.3232
163	0.1503	0.2399
164	0.2078	0.1688
165	0.1348	0.1909
166	0.123	0.1657
167	0.1057	0.1158
168	0.087	0.1362
169	0.1042	0.1676
170	0.1135	0.1448
171	0.0955	0.1205
172	0.0942	0.15
173	0.1091	0.1752
174	0.1053	0.1534
175	0.0931	0.1347
176	0.1082	0.1704
177	0.1206	0.1835
178	0.1038	0.1528
179	0.1124	0.1478
180	0.1385	0.1842
181	0.1416	0.1828
182	0.1362	0.1566
183	0.1653	0.1767
184	0.2029	0.2077
185	0.1913	0.1955
186	0.2113	0.1888
187	0.1943	0.2228
188	0.3172	0.3858
189	0.3188	0.4841
190	0.2554	0.5195
191	0.2457	0.4353
192	0.2757	0.3141
193	0.3336	0.2278
194	0.3095	0.1597
195	0.2204	0.1399
196	0.1865	0.1545
197	0.1389	0.1513
198	0.1289	0.1422
199	0.1208	0.1282
200	0.108	0.126
201	0.0876	0.1082
202	0.0743	0.0933
203	0.0897	0.0873
204	0.0836	0.0799
205	0.0681	0.0767
206	0.0692	0.0786
207	0.0642	0.0794
208	0.0544	0.0734
209	0.0598	0.0954
210	0.0598	0.1116
211	0.0521	0.0938
212	0.0575	0.101
213	0.0739	0.154
214	0.0769	0.1644
215	0.0752	0.1322
216	0.0927	0.1774
217	0.1306	0.2986
218	0.1573	0.2157
219	0.1524	0.2344
220	0.1619	0.2077
221	0.2258	0.1879
222	0.2095	0.1598
223	0.1791	0.1292
224	0.227	0.1128
225	0.2504	0.1253
226	0.2192	0.1211
227	0.2172	0.1032
228	0.2191	0.1241
229	0.1884	0.1278
230	0.1587	0.1093
231	0.1896	0.1325
232	0.1829	0.1572
233	0.1384	0.1483
234	0.1528	0.1456
235	0.1825	0.1872
236	0.1559	0.2057
237	0.1471	0.1849
238	0.1769	0.2011
239	0.1709	0.2399
240	0.1713	0.2506
241	0.1884	0.2608
242	0.2297	0.2729
243	0.3263	0.2285
244	0.432	0.2287
245	0.3678	0.2285
246	0.3467	0.2791
247	0.2757	0.2495
248	0.2546	0.2016
249	0.2202	0.2041
250	0.2128	0.2051
251	0.1967	0.204
252	0.1569	0.1748
253	0.1187	0.1621
254	0.1222	0.1499
255	0.132	0.1256
256	0.1	0.1124
257	0.0871	0.1176
258	0.1176	0.1081
259	0.1184	0.1023
260	0.0703	0.1075
261	0.1044	0.1049
262	0.1449	0.1195
263	0.106	0.141
264	0.0828	0.1121
265	0.1692	0.1453
266	0.2688	0.1593
267	0.24	0.1653
268	0.2629	0.1622
269	0.1988	0.1822
270	0.1919	0.1465
271	0.2348	0.1553
272	0.2156	0.1366
273	0.1742	0.1269
274	0.2028	0.134
275	0.2151	0.1249
276	0.1539	0.1085
277	0.1644	0.1095
278	0.1901	0.1057
279	0.1699	0.1016
280	0.1286	0.0938
281	0.1255	0.0878
282	0.1102	0.0819
283	0.0979	0.0825
284	0.0969	0.0817
285	0.1067	0.0891
286	0.1178	0.0997
287	0.1171	0.0888
288	0.1124	0.0905
289	0.1221	0.0921
290	0.1069	0.0834
291	0.1056	0.0838
292	0.0918	0.0847
293	0.078	0.0784
294	0.0831	0.0753
295	0.0914	0.0763
296	0.0893	0.0957
297	0.0776	0.1063
298	0.0877	0.0916
299	0.1019	0.0934
300	0.0979	0.1191
301	0.1045	0.116
302	0.1263	0.107
303	0.1327	0.1306
304	0.1331	0.1545
305	0.1588	0.1677
306	0.1833	0.1717
307	0.2182	0.2159
308	0.2451	0.2352
309	0.2274	0.2349
310	0.1748	0.2651
311	0.1913	0.2648
312	0.1996	0.2692
313	0.1908	0.2723
314	0.1629	0.1989
315	0.1562	0.138
316	0.162	0.1464
317	0.1478	0.1504
318	0.1286	0.1112
319	0.1325	0.0994
320	0.1392	0.1214
321	0.122	0.1157
322	0.1074	0.0886
323	0.1229	0.0937
324	0.1267	0.1057
325	0.1057	0.095
326	0.1072	0.0823
327	0.13	0.0911
328	0.1273	0.1004
329	0.1086	0.0951
330	0.1239	0.092
331	0.1399	0.1068
332	0.1278	0.1198
333	0.1152	0.1209
334	0.1552	0.1238
335	0.2199	0.1572
336	0.2275	0.1728
337	0.1805	0.1554
338	0.2247	0.1614
339	0.2824	0.1832
340	0.3072	0.2147
341	0.2983	0.1724
342	0.2623	0.197
343	0.2246	0.3281
344	0.1794	0.34
345	0.1312	0.2263
346	0.1433	0.1679
347	0.1291	0.2684
348	0.0994	0.2676
349	0.1009	0.1692
350	0.1128	0.152
351	0.1004	0.2327
352	0.084	0.2347
353	0.0838	0.1539
354	0.1111	0.1163
355	0.1196	0.1246
356	0.0979	0.1103
357	0.0761	0.132
358	0.083	0.1465
359	0.0872	0.1314
360	0.0854	0.1095
361	0.0796	0.1267
362	0.0929	0.1428
363	0.1058	0.1328
364	0.1011	0.1163
365	0.1154	0.1353
366	0.1428	0.1592
367	0.1317	0.1718
368	0.1456	0.2132
369	0.1352	0.1835
370	0.1413	0.1779
371	0.1938	0.1942
372	0.236	0.262
373	0.1887	0.3388
374	0.1757	0.552
375	0.2155	0.6502
376	0.3141	0.8525
